# Supplementary material for: Improved recombinant expression of soluble cathepsin B and L in Escherichia coli
Source: PubMed Central journal article supplement (PMC11649755; doi:10.1007/s00253-024-13374-1), 2024-12-16
Supplement: 253_2024_13374_MOESM1_ESM.pdf [file 253_2024_13374_MOESM1_ESM.pdf]

## Supplementary Information

### Improved Recombinant Expression of Soluble Cathepsin B and L in *Escherichia coli*

Christina Möller<sup>1</sup>, Niklas Rimkus<sup>1</sup>, Ferdinand F. O. Skala<sup>1</sup>, Maëlle Merouze<sup>1</sup>, Dominique Böttcher<sup>1</sup>, Mark Dörr<sup>1</sup>, Uwe T. Bornscheuer<sup>1\*</sup>

<sup>1</sup>Institute of Biochemistry, Department of Biotechnology and Enzyme Catalysis, University of Greifswald, Greifswald, Germany

\*Corresponding author: E-mail: [uwe.bornscheuer@uni-greifswald.de](mailto:uwe.bornscheuer@uni-greifswald.de)

## **Amino acid sequences of the synthetic genes of CTSB and CTSL variants**

### **CTSB:**

**CTSB\_N-6xHis** (lysosomal protease cathepsin B from mouse with a N-terminal His<sub>6</sub>-tag, based on NCBI-code: NP\_031824.1):

MHHHHHHGSSGENLYFQSHDKPSFHPLSDDLINYNKQNTTWQAGRNFYNVDISYLKCLCGT  
VLGGPKLPGRVAFGEDIDLPEFDAREQWSNCPTIGQIRDQGSCGSCWAFGAVEAISDRTCIHT  
NGRVNVEVSAEDLLTCCGIQCGDGCNGGYPSGAWSFWTKKGLVSGGVYNHSHVGLPYTIPP  
CEHHVNGSRPPCTGEGDTPRCNKSCAGYSPSYKEDKHFYTSYSVSNVKEIMAEIYKNGPV  
EGAFTVFSDFLTYKSGVYKHEAGDMMGGHAIRILGWGVENGVPYWLAANSWNLDWGDNG  
FFKILRGENHCGIESEIVAGIPRTDQYWGRF

**CTSB\_C-6xHis** (lysosomal protease cathepsin B from mouse with a C-terminal His<sub>6</sub>-tag, based on NCBI-code: NP\_031824.1):

MHDKPSFHPLSDDLINYNKQNTTWQAGRNFYNVDISYLKCLCGTVLGGPKLPGRVAFGEDI  
DLPEFDAREQWSNCPTIGQIRDQGSCGSCWAFGAVEAISDRTCIHTNGRVNVEVSAEDLLTC  
CGIQCGDGCNGGYPSGAWSFWTKKGLVSGGVYNHSHVGLPYTIPPCEHHVNGSRPPCTGEG  
DTPRCNKSCAGYSPSYKEDKHFYTSYSVSNVKEIMAEIYKNGPVEGAFTVFSDFLTYKSG  
VYKHEAGDMMGGHAIRILGWGVENGVPYWLAANSWNLDWGDNGFFKILRGENHCGIESEI  
VAGIPRTDQYWGRFENLYFQSGSSGHHHHHH

**CTSB\_M-6xHis** (lysosomal protease cathepsin B from mouse with His<sub>6</sub>-tag after the N-terminal propeptide, based on NCBI-code: NP\_031824.1):

MHDKPSFHPLSDDLINYNKQNTTWQAGRNFYNVDISYLKCLCGTVLGGPKLPGRVAFGEDI  
DGSSGHHHHHHGSSGENLYFQSLPETFDAREQWSNCPTIGQIRDQGSCGSCWAFGAVEAISDR  
TCIHTNGRVNVEVSAEDLLTCCGIQCGDGCNGGYPSGAWSFWTKKGLVSGGVYNHSHVGLP  
YTIPPCEHHVNGSRPPCTGEGDTPRCNKSCAGYSPSYKEDKHFYTSYSVSNVKEIMAEIY  
KNGPVEGAFTVFSDFLTYKSGVYKHEAGDMMGGHAIRILGWGVENGVPYWLAANSWNLD  
WGDNGFFKILRGENHCGIESEIVAGIPRTDQYWGRF

### **CTSL:**

**CTSL\_N-6xHis** (lysosomal protease cathepsin L from mouse with N-terminal His<sub>6</sub>-tag, based on NCBI-code: NP\_034114.1):

MHHHHHHGMASENLYFQSTPKFDQTFSAEWHQWKSTHRRLYGTNEEEWRRAIWEKNMRMI  
QLHNGEYSNGQHGFMEMNAFGDMTNEEFRQVVNGYRHKHKKGRLEPLMLKIPKSVD  
WREKGCVTPVKNQGGQCGSCWAFSASGCLEGQMFLKTGKLISLSEQNLVDCSHAQGNQGCN

GGLMDFAFQYIKENGLDSEESYPYEAKDGSCKYRAEFAVANDTGFVDIPQQEKALMKAVA  
TVGPISVAMDASHPSLQFYSSGIYYEPNCSSKNLDHGVLLVGYGYEGTDSNKNKYWLKNS  
WGSEWGMEGYIKIAKDRDNHCGLATAASYPVVN

**CTSL\_C-6xHis** (lysosomal protease cathepsin L from mouse with C-terminal His<sub>6</sub>-tag, based on  
NCBI-code: NP\_034114.1):

MTPKFDQTFSAEWHQWKSTHRRLYGTNEEEWRRAIWEKNMRMIQLHNGEYSNGQHGFMSME  
MNAFGDMTNEEFRQVVNGYRHKHKKGRLFQEPLMLKIPKSVDWREKGCVTPVKNQGQCG  
SCWAFSASGCLEGQMFLKTGKLISLSEQNLVDCSHAQGNQGCNGLMDFAFQYIKENGLD  
SEESYPYEAKDGSCKYRAEFAVANDTGFVDIPQQEKALMKAVATVGPISVAMDASHPSLQFY  
SSGIYYEPNCSSKNLDHGVLLVGYGYEGTDSNKNKYWLKNSWGSEWGMEGYIKIAKDRD  
NHCGLATAASYPVVNENLYFQSLEHHHHHH

## Nucleotide sequences of the synthetic genes of CTSB variants and CTSL

### CTSB:

**CTSB\_N-6xHis** (lysosomal protease cathepsin B from mouse with a N-terminal His<sub>6</sub>-tag, GenBank accession number: PQ417953):

```
atgcatcatcatcaccacggtagcagtgggcggaaatctgtacttccagagccatgataaaccgagcttccatccgctgagtgatgatctgattaatt
atattaacaagcagaacaccacctggcaggcaggccgtaacttctataatgtggatattggtacctaagaagctgtgtggtaccgttctgggtggc
cgaaactccgggtcgtgtgcttcggcgaagatattgatctgccggaaaccttcgatcccgtaacagtgaggcaattgcccaccattggcca
gattcgcgatcaggtagctgtggcagctgtgggcttcggcgccgtgaagccattagcgtacctgtattcataccaatggtcgcgtgaatg
ttgaagtgagcgcagaagatctgctgacctgtgtggttattcagtgccggtgatggtgcaatggtggctatccgagcggcgatggagcttctggacc
aaaaaggctcggtagtggtggcgtgtataatagtcattgtgtggttctcgcgtataccattccgctgtgaacatcatgtaattggcagcggccc
ccgtgtaccggtgaaggtgataccccgctgttaataaagctgtgaagccggttatagtcggagctataaagaagataaaccttcgctatacca
gttatagtgtagcaatagcgttaaagaattatggccgaaatctataagaacggcccggtggaaggcgcattcaccgtgtcagcagcttctgacc
tataaagcggcgtgtataaacatgaagcaggcgatgatggggcccatgcaattcgtattctgggctgggggtgtgaaaatggcgttccgtattg
gctggccgcaaatagctggaatctggattggggcgataatggcttctcaaaattctcgtggtgaaaatcattcgggtattgaaagcgaattgtggc
aggcattccgcgcaccgatcagattggggctcgttctaactcgag
```

**CTSB\_C-6xHis** (lysosomal protease cathepsin B from mouse with a C-terminal His<sub>6</sub>-tag, GenBank accession number: PQ417954):

```
atgcatgataagccgagcttccatccgctgagcgtgatctgattaattatattaacaagcagaacaccacctggcaggcaggccgtaacttctataat
gttgatattagttacctgaagaagctgtcggcaccgtgctgggtgtccgaaactccgggtcgcgtggccttcgggaagatattgatctgccgg
aaacctcgtatcccgtgaacagtgaggtaattgcccaccattggccagattcgtgatcagggtagttgtgtagctgttggccttcggcgagtg
gaagccattagtgatcgtacctgtattcataccaatggtcgtgtgaatgtgaagtgagtcgagaagatctgctgacctgttggcgattcagtgccgt
gatggtgtaatggtggtatccgagcggcgcatggagcttctggacaaaaaggcctggttagcgggtggcgtgtataatagtcattgggctgcct
gccgtataccattccgctgtgaacatcatgtaatggtagtcgcccgctgtaccggtgaaggcgataccccgcgtgtataaaagtgcgaa
ggcggtatagtcgagttataaagaagataaaccttcggctataccagctatagcgttagcaatagcgttaaagaattatggcagaaatctataag
aacggcccggtggaagtgcttcaccgtgtcagtgacttctgacctataaaagtggtggtgtataaacatgaagcaggcgatgatgggtggc
atgcaattcgcattctgggtggggcgtgaaaatggtgtccgtattggctggccgcaatagttggaatctggattggggcgataatggcttctca
aaattctgcgcggcgaaaatcattcggcgattgaaagcgaattgttcaggtattccgcgtaccgatcagattggggctcgttcgaaaatctgtactt
ccagagcggtagcagtggtcatcatcatcaccat
```

**CTSB\_M-6xHis** (lysosomal protease cathepsin B from mouse with His<sub>6</sub>-tag after the N-terminal propeptide, GenBank accession number: PQ417955):

```
Atgcatgataagccgagcttccatccgctgagtgatgatctgattaattatattaacaagcagaacaccacctggcaggcaggctgtaacttctataat
gttgatattagttacctgaagaagctgtgtggtaccgtgctgggtggccccgaaactccggggtggtgattcgggtgaagatattgatggcagca
gtggccatcatcatcaccacggtagcagcgggtgaaatctgtacttccagagcctgccggaaaccttcgatgcacgcgaacagtgaggcaatt
gtccgaccattggccagattcgtgatcaggtagctgcggtagttgctgggcattcggcgagtggaagcaattagtgatcgtacctgattcatacc
```

aatggtcgtgtaatgtgaagtgagtgccgaagatctgctgacctgctgtggcattcagtggtgatggctgtaatggtggctatccgagtggcgcc  
tggagcttctggacaaaaaaggctgtgtagcgggtggcgtgtataatagccatgtgggctgcctgccgtataccattccgccgtgcgaacatcatgt  
taatggtagtcgtccgccgtgaccggcgaaggtgataccccgcgttgaataaaaagttgtgaagccggctatagtcgagttataaagaagataaa  
cacttcggctataccagttatagcgttagtaatagttaaagagatcatggcagaatctataaaaacggcccggttgaaggtgattcaccgtgtca  
gcgacttctgacctataaaagtggcgtgtataaacatgaagccggcgatatgatgggtggccatgccattcgattctgggtggggcgtggaaaa  
tggcgttccgtattggctggccgcaaatagttggaatctggattggggcgataatggcttctcaaaattctgcgcggtgaaaaatcattcggtattgaa  
agcgaatgtgtcaggcattccgcgcaccgatcagtattggggccgcttctaactcgag

**CTSL\_N-6xHis** (lysosomal protease cathepsin L from mouse with N-terminal His<sub>6</sub>-tag, GenBank  
accession number: PQ417956):

Atgcatcatcatcaccacggtatggccagcgaaaatctgtactccagagcaccgccaaatc gatcagaccttcagcgcgcaatggcatcagt  
ggaaaagtaccatcgccgctgtatggaccaatgaagaagaatggcgtcgcgcaatctgggaaaaaatatgcgcatgattcagctgcataatg  
gcgaatatagcaatggcagcatggcttcagatggaaatgaatgccttcggtgatatgaccaatgaagattccgccaggtggttaatggctatcgtc  
atcagaaaataaaaaaggctgcctgttcaggaaccgctgatgctgaaaatccgaaaagtgtggattggcgcgaaaaaggttgcgtgacccggg  
tataaatcagggccagtgccgagttgctgggccttcagcgcagcggctgcctggaaggccagatgtcctgaaaaccggcaaaactgattagtc  
tgagtgaacagaatctggtgattgtagtcatgccagggtaatcagggctgcaatggcggctgatggacttcgcttccagtatattaagaaaaatg  
gtggcctggatagtgaaagaaagtatccgtatgaagcaaaagatggcagttgaaatcgcgcagaatccgctggccaatgataccggctcgtt  
gatattccgcagcaggaaaaagccctgatgaaagccgtggccaccgtgggcccgattagcgtggcaatggatgccagtcacccagcctgcagtt  
ctatagcagtggtcattatgaaccgaattgcagcagtaaaaatctggatcatggtgtgctgctggttggttatggttatgaaggtaccgatagtaata  
aaaataagtactggctggttaagaacagttggggcagcgaatgggggtatggaaggctatataaaattgcaaaagaccgtgataaccattgcggctc  
ggccaccgcagcaagttatccggttgttaattaataactcgag

**CTSL\_C-6xHis** (lysosomal protease cathepsin L from mouse with C-terminal His<sub>6</sub>-tag, GenBank  
accession number: PQ417957):

Atgacccgaaatc gatcagaccttcagcgcgcaatggcatcagtggaaggtaccatcgccgctgtatggaccaatgaagaagaatggcg  
tcgcgcaatctgggaaaaaatatgcgcatgattcagctgcataatggcgaatatagcaatggtcagcatggcttcagatggaaatgaatgccttcg  
gtgatatgaccaatgaagagtccgccaggtggttaatggctatcgtcatcagaaacataaaaaaggctgcctgttccaggaaccgctgatgctgaa  
aattccgaaaagtgtgattggcgcgaaaaaggttgcgtgacccgggttaaaatcagggccagtcggcagttgctgggccttcagcgcagcgcg  
gctgcctggaaggccagatgtcctgaaaaccggcaaaactgattagctgagtgaacagaatctggtgattgtagtcatgccagggtaatcaggg  
ctgcaatggcggctgatggacttcgcttccagtatattaagaaaaatggtggcctggatagtgaaagaaagtatccgtatgaagcaaaagatggca  
gttgtaaatatcgcgcagaatccgctggccaatgataccggcttctgtatattccgcagcaggaaaaagccctgatgaaagccgtggccaccgt  
gggcccgattagcgtggcaatggatgccagtcacccagcctgcagttctatagcagtggtcattatgaaccgaattgcagcagtaaaaatctgg  
atcatggtgtgctgctggttggttatggtatgaaggtaccgatagtaaaaaataagtactggctggttaagaacagttggggcagcgaatggggta  
tggaaaggctatataaaattgcaaaagaccgtgataaccattgcggcttggccaccgcagcaagttatccggttgttaaatgaaatctgacttccaga  
gcctcgagcaccaccaccaccac

## Figures

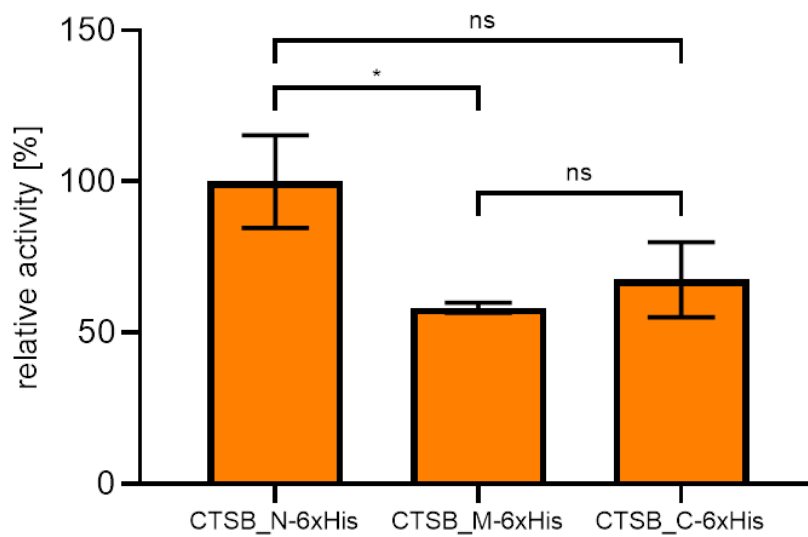

**Fig. S1** Relative activities of the mature cathepsin B variants CTSB\_N-6xHis, CTSB\_M-6xHis and CTSB\_C-6xHis using Arg-Arg-AMC as substrate. CTSB\_N-6xHis activity was normalized to 100 % and the relative activities of the two other variants were calculated by dividing the data of the variant with the data of CTSB\_N-6xHis multiplied with 100 to gain percentage activities. The data represent three independent experiments and the significance was calculated by two-tailed Student t test for independent samples.

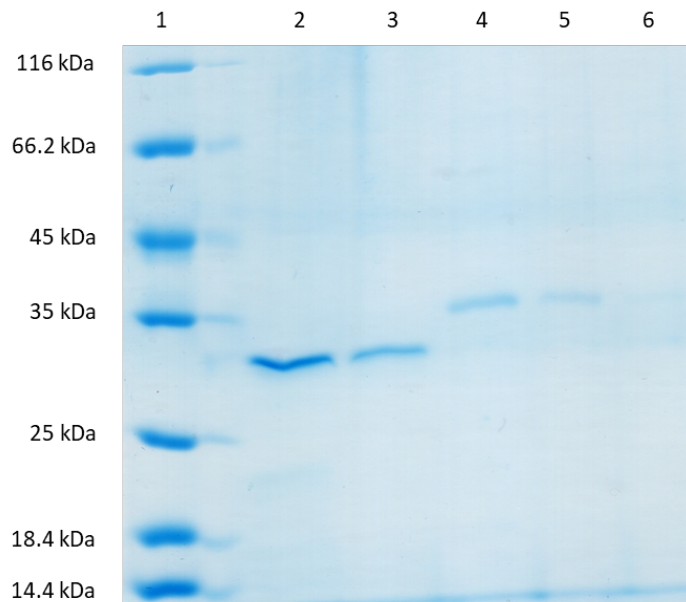

**Fig. S2** SDS-PAGE analysis of partly activated CTSB\_C-6xHis after separation via affinity chromatography. Shown are the protein marker (lane 1), the flow through (lane 2), wash fraction 2 (lane 3), elution fraction 1 (lane 4), elution fraction 2 (lane 5) and elution fraction 3 (lane 6). Pierce™ Unstained Protein MW Marker (ThermoFisher, Germany) was used as a reference.

## Tables

**Table S1.** Overview of the molecular weights (MW) and extinction coefficients ( $\epsilon$ ) of the cathepsin B (CTSB) and cathepsin L (CTSL) variants calculated via ProtParam. Shown are the MWs of the expressed proCTSB and proCTSL constructs and their corresponding  $\epsilon$ , the MWs of the mature cathepsins and their corresponding  $\epsilon$ , as well as the MWs of the N-terminal propeptide of CTSB and CTSL and the MWs of the C-terminal propeptide of CTSB.

|                     | MW of proCTSB/<br>proCTSL [Da] | $\epsilon$ of proCTSB/<br>proCTSL [ $M^{-1} cm^{-1}$ ] | MW of mature CTSB/CTSL [Da] | $\epsilon$ of mature variants [ $M^{-1} cm^{-1}$ ] | MW of the N-terminal propeptide [Da] | MW of the C-terminal propeptide [Da] |
|---------------------|--------------------------------|--------------------------------------------------------|-----------------------------|----------------------------------------------------|--------------------------------------|--------------------------------------|
| <b>CTSB_N-6xHis</b> | 37500.69                       | 79715                                                  | 27577.67                    | 61265                                              | 9103.10                              | 855.95                               |
| <b>CTSB_C-6xHis</b> | 37500.69                       | 79715                                                  | 27577.67                    | 61265                                              | 7110.05                              | 2849.00                              |
| <b>CTSB_M-6xHis</b> | 37788.95                       | 79715                                                  | 29858.98                    | 62755                                              | 7110.05                              | 855.95                               |
| <b>CTSL_N-6xHis</b> | 38005.50                       | 73840                                                  | 24080.93                    | 45880                                              | 13924.57                             | –                                    |
| <b>CTSL_C-6xHis</b> | 37901.37                       | 73840                                                  | 26027.99                    | 47370                                              | 13924.57                             | –                                    |

**Table S2.** List of disulfide bridges in murine cathepsin B (CTSB) and murine cathepsin L (CTSL) and their corresponding amino acids.

| <b>proCTSB</b> | <b>proCTSL</b> |
|----------------|----------------|
| Cys76-Cys105   | Cys118-Cys161  |
| Cys88-Cys133   | Cys152-Cys194  |
| Cys124-Cys190  | Cys252-Cys305  |
| Cys125-Cys128  |                |
| Cys162-Cys194  |                |
| Cys170-Cys181  |                |



## **Materials and Methods**

The activities of cathepsin B variants were determined in 50 mM sodium phosphate buffer pH 6.0 using the chromogenic substrate Z-Arg-Arg-AMC (Bachem, Bubendorf, Switzerland). 10  $\mu$ l of the cathepsin B variant ( $0.125 \text{ mg mL}^{-1}$ ) were prepared in a microtiter plate and the reaction was started by the addition of 90  $\mu$ L of the AMC substrate solution ( $2 \text{ }\mu\text{M}$ ) supplemented with 10 mM DTT. After 5 min incubation, the fluorescence was measured at an extinction wavelength of 360 nm and an emission wavelength of 470 nm.
